# Supplementary material for: Cu-CDots nanocorals as electrocatalyst for highly efficient CO2reduction to formate
Source: Royal Society of Chemistry journal article supplement (doi:10.1039/c6nr08104e), 2016-11-23
Supplement: c6nr08104e1.pdf [file c6nr08104e1.pdf]

*Supporting information for*

**Cu-CDots nanocorals as electrocatalyst for highly efficient CO<sub>2</sub> reduction to formate**

*Sijie Guo, Siqi Zhao, Jin Gao, Cheng Zhu, Xiuqin Wu, Yijun Fu, Hui Huang, Yang Liu\* and Zhenhui Kang\**

Jiangsu Key Laboratory for Carbon-Based Functional Materials & Devices, Institute of Functional Nano & Soft Materials (FUNSOM), Soochow University, 199 Ren'ai Road, Suzhou, 215123, Jiangsu, PR China. E-mail: [yangl@suda.edu.cn](mailto:yangl@suda.edu.cn); [zhkang@suda.edu.cn](mailto:zhkang@suda.edu.cn); Tel: +86 512 65880957

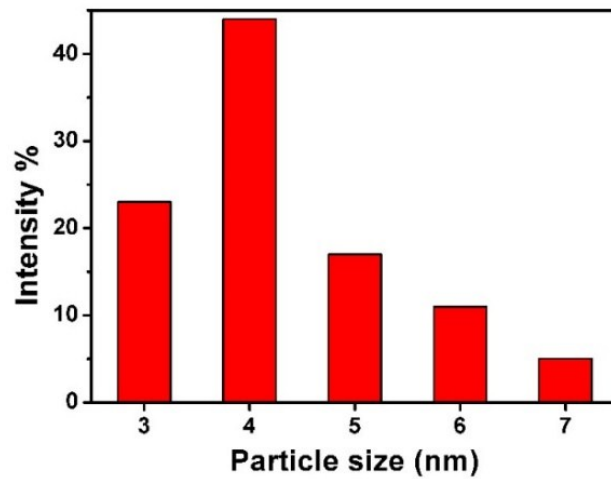

Fig. S1 CDot size distribution.

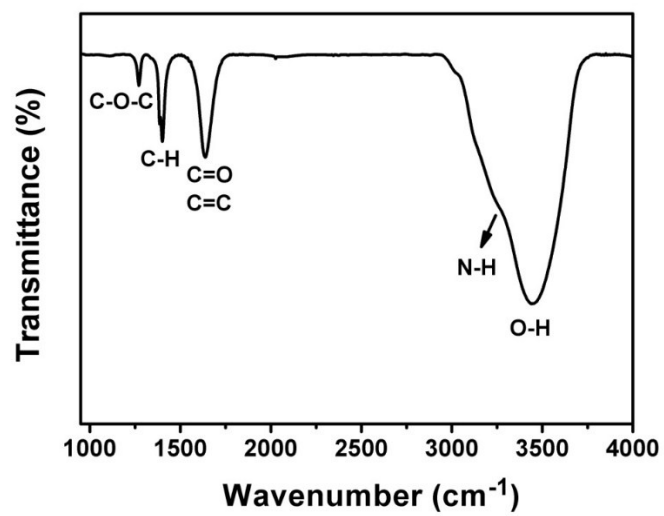

Fig. S2 The FTIR spectrum of CDots.

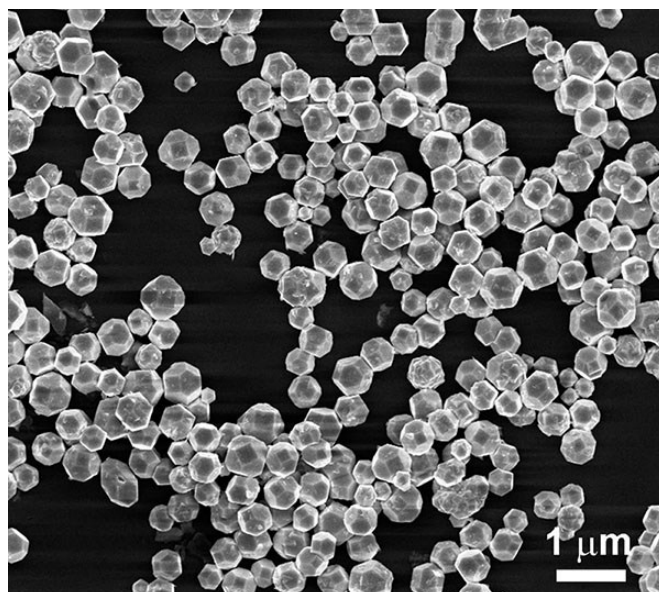

Fig. S3 The SEM image of  $\text{Cu}_2\text{O}$  nanoparticles.

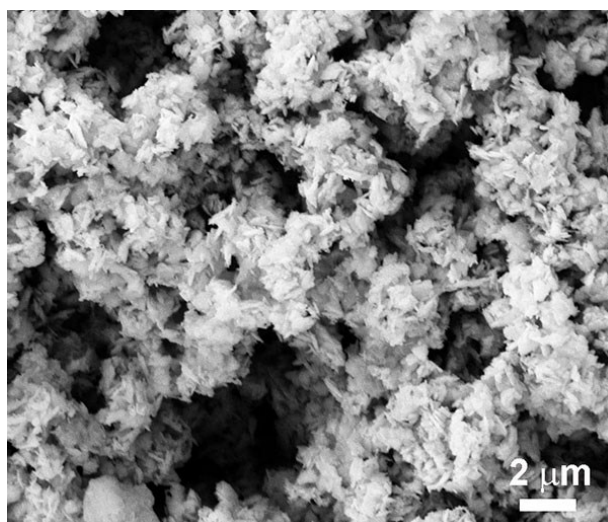

Fig. S4 The SEM image of  $\text{Cu}_2\text{O}$ -CDots nanocorals.

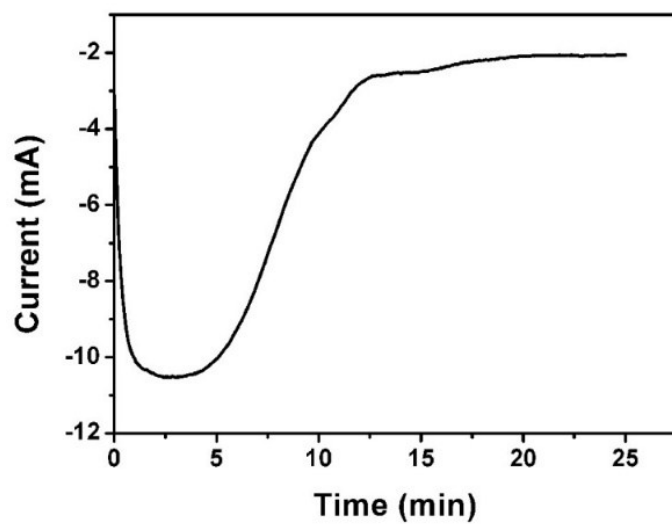

Fig. S5 Electrode current recorded during reduction of  $\text{Cu}_2\text{O}$ -CDot nanocorals at  $-0.4$  V vs. RHE in  $0.5$  M  $\text{KHCO}_3$  purged with  $\text{N}_2$  gas.

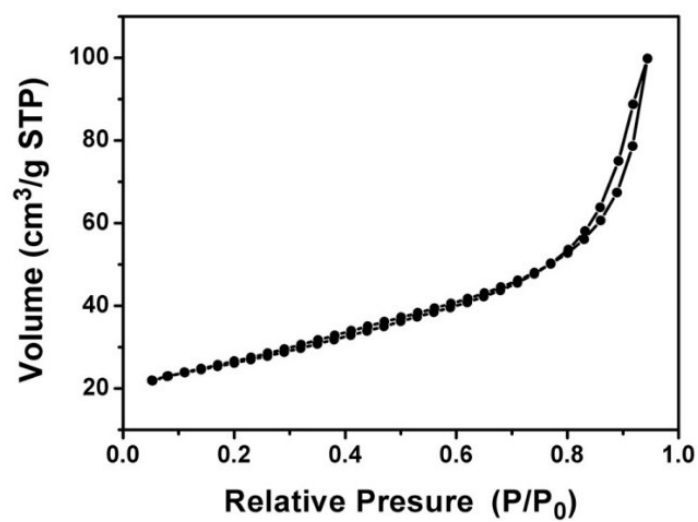

Fig. S6  $\text{N}_2$  adsorption-desorption isotherm of Cu-CDots nanocorals.

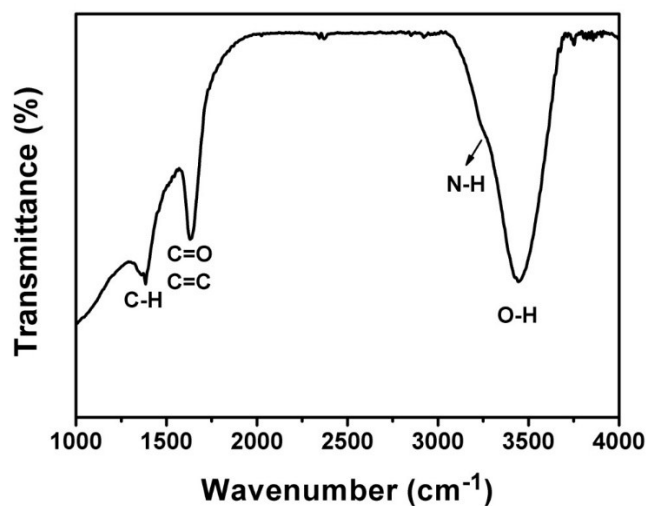

Fig. S7 The FTIR spectrum of Cu-CDots nanocorals.

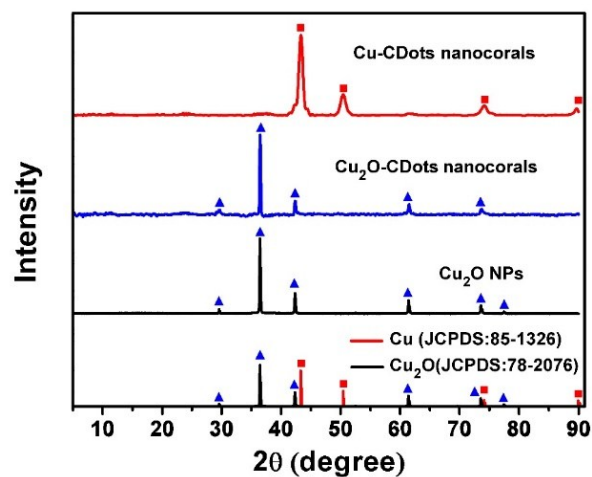

Fig. S8 Large-angle XRD patterns of Cu-CDotsnanocorals (the red trace), Cu<sub>2</sub>O-CDots nanocorals (the blue trace) and Cu<sub>2</sub>O NPs (black trace). The diffraction peaks of Cu<sub>2</sub>O (black trace) can be easily indexed to a pure phase of cuprous oxide (JCPDS card no. 78-2076). The dominant peaks of Cu<sub>2</sub>O at 36°, 42° and 61° correspond to lattice planes (111), (200) and (220), respectively. The intense and sharp peaks indicate the high crystallinity of Cu<sub>2</sub>O nanocrystals. The XRD spectrum of Cu<sub>2</sub>O-CDots nanocorals is almost similar with that of Cu<sub>2</sub>O.

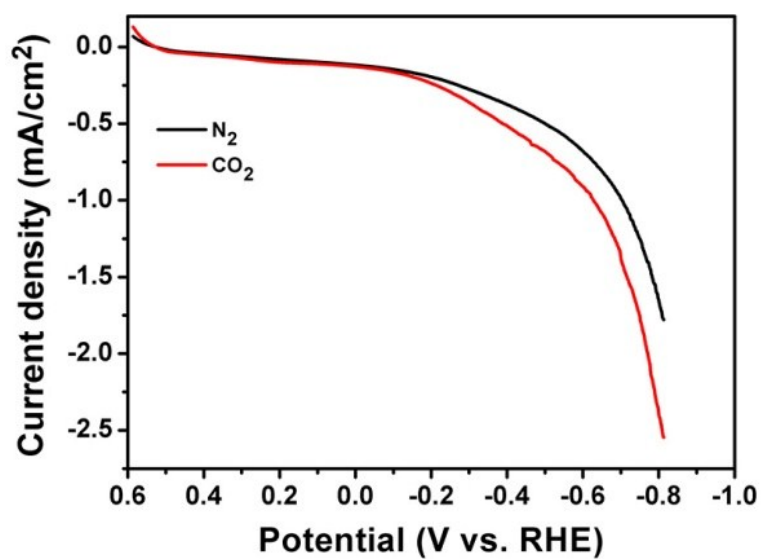

Fig. S9 LSVs for CDots in N<sub>2</sub>- (black trace) and CO<sub>2</sub>-saturated (red trace) 0.5 M KHCO<sub>3</sub> electrolyte, 10 mV•s<sup>-1</sup>. The reduced product is only H<sub>2</sub> in N<sub>2</sub>- or CO<sub>2</sub>-saturated 0.5 M KHCO<sub>3</sub> electrolyte.

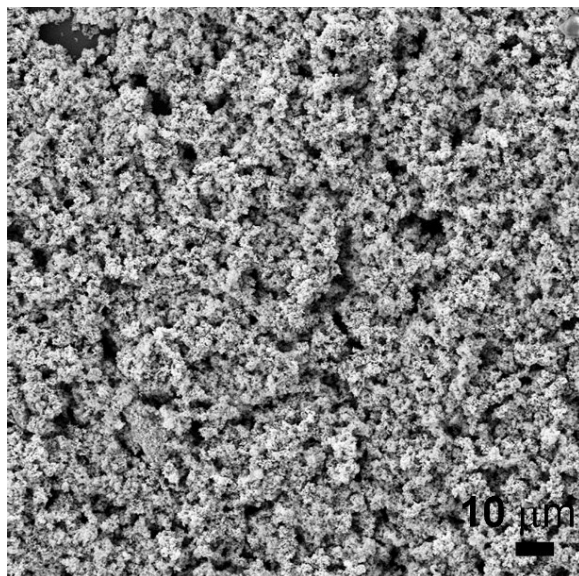

Fig. S10 The SEM image of Cu nanocorals.

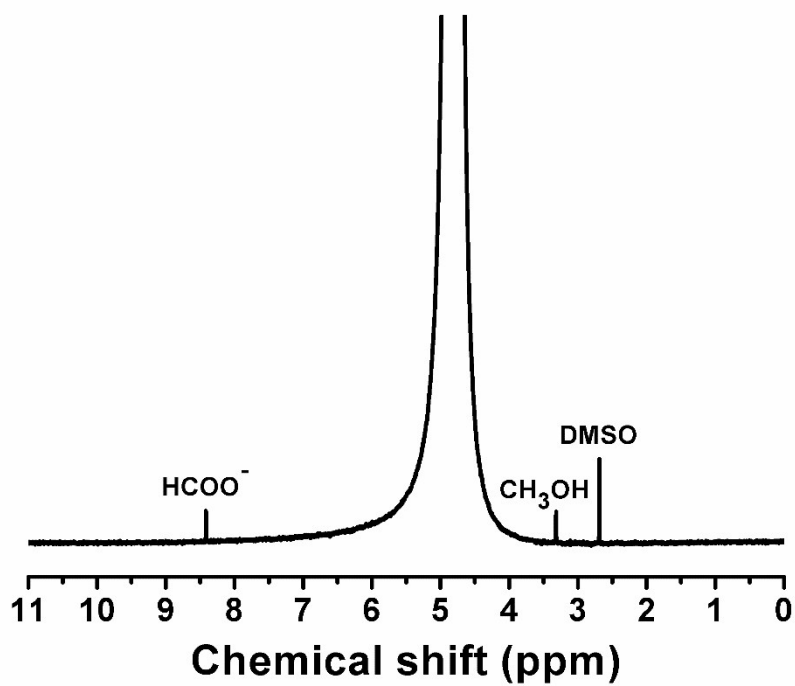

Fig. S11 Representative NMR spectra of the electrolyte after CO<sub>2</sub> reduction electrolysis at -0.6 V vs. RHE.
